# Supplementary material for: Does Variation of the Inter-Domain Linker Sequence Modulate the Metal Binding Behaviour of Helix pomatia Cd-Metallothionein?
Source: MDPI journal article supplement (doi:10.3390/ijms17010006), 2015-12-22
Supplement: s1 [file s1]

# Supplementary Materials: Does Variation of the Inter-Domain Linker Sequence Modulate the Metal Binding Behaviour of *Helix pomatia* Cd-Metallothionein?

Selene Gil-Moreno, Elena Jiménez-Martí, Òscar Palacios, Oliver Zerbe, Reinhard Dallinger, Mercè Capdevila and Sílvia Atrian

---

## **HpCdMT: wild type *Helix pomatia* CdMT**

HpCdMT cDNA sequence (with short linker highlighted in blue): 220pb

TTTATTGGATCCGGAAAAGGAAAAGGAGAAAAGTGCACCTCAGCTTGCAGGAGCGAGCCTTGC  
CAGTGTGGGAGCAAGTGCCAGTGTGGGGAAGGCTGTACATGTGCCGCCCTGC **AAGACT**TGCAAC  
TGTACCAAGTGATGGTTGCAAGTGCAGGAGTGCACCGGCCAGACTCGTGCAAGTGTGGC  
AGCTCGTGCAGCTGCAAGTAACTCGAGAAAA

HpCdMT protein sequence:

MSGKKGKEKCTSACRSEPCQCGSKCQCGEGCTCAAC **KT**CNCTSDGCKCGKECTGPDS  
CKCGSSCSCK\*

---

## **HpCdMcMT: *Helix pomatia* CdMT with the linker of the *M. crenulata* MT**

HpCdMcMT cDNA sequence (linker from *Megathura crenulata* highlighted in pink): 237 pb

TTTATTGGATCCGGAAAAGGAAAAGGAGAAAAGTGCACCTCAGCTTGCAGGAGCGAGCCTTGC  
CAGTGTGGGAGCAAGTGCCAGTGTGGGGAAGGCTGTACATGTGCCGCCCTGC **GTGAAGACAGAA**  
**GCCAAAACCACG**TGCAACTGTACCAAGTGTGGTTGCAAGTGCAGGAGTGCACCGGCCCA  
GACTCGTGCAGTGTGGCAGCTCGTGCAGCTGCAAGTAACTCGAGAAAA

HpCdMcMT protein sequence:

MSGKKGKEKCTSACRSEPCQCGSKCQCGEGCTCAAC **VKTEAKTT**CNCTSDGCKCGKE  
CTGPDSCKCGSSCSCK\*

---

## **HpCdPIMT: *Helix pomatia* CdMT with the linker of the *Ec-1* wheat MT**

HpCdPIMT cDNA sequence (linker from the *Ec-1* wheat highlighted in green): 237 pb

TTTATTGGATCCGGAAAAGGAAAAGGAGAAAAGTGCACCTCAGCTTGCAGGAGCGAGCCTTGC  
CAGTGTGGGAGCAAGTGCCAGTGTGGGGAAGGCTGTACATGTGCCGCCCTGC **TCGGCCGAGGAGC**  
**GGCCGGCCGGCC**TGCAACTGTACCAAGTGTGGTTGCAAGTGCAGGAGTGCACCGGCCCA  
GACTCGTGCAGTGTGGCAGCTCGTGCAGCTGCAAGTAACTCGAGAAAA

HpCdPIMT protein sequence:

MSGKKGKEKCTSACRSEPCQCGSKCQCGEGCTCAAC **SARSGAAA**CNCTSDGCKCGK  
ECTGPDSCKCGSSCSCK\*

---

**Figure S1.** cDNA and protein sequence information of the proteins studied in this work. The constructs HpCdMcMT and HpCdPIMT, in comparison with the HpCdMT wild type form. The cDNA and protein sequence corresponding to the linker segments are colored, and the grey boxes indicate the 5' and 3' restriction sites (*Bam*HI and *Xho*I, respectively) used for cloning into the pGEX-4T-1 plasmid.
